# Supplementary material for: Development of quantitative high-throughput screening assays to identify, validate, and optimize small-molecule stabilizers of misfolded β-glucocerebrosidase with therapeutic potential for Gaucher disease and Parkinson’s disease
Source: PubMed Central journal article supplement (PMC11071283; doi:10.1101/2024.03.22.586364), 2024-03-27
Supplement: NIHPP2024.03.22.586364v1-supplement-3.pdf [file NIHPP2024.03.22.586364v1-supplement-3.pdf]

Supplemental Figures:

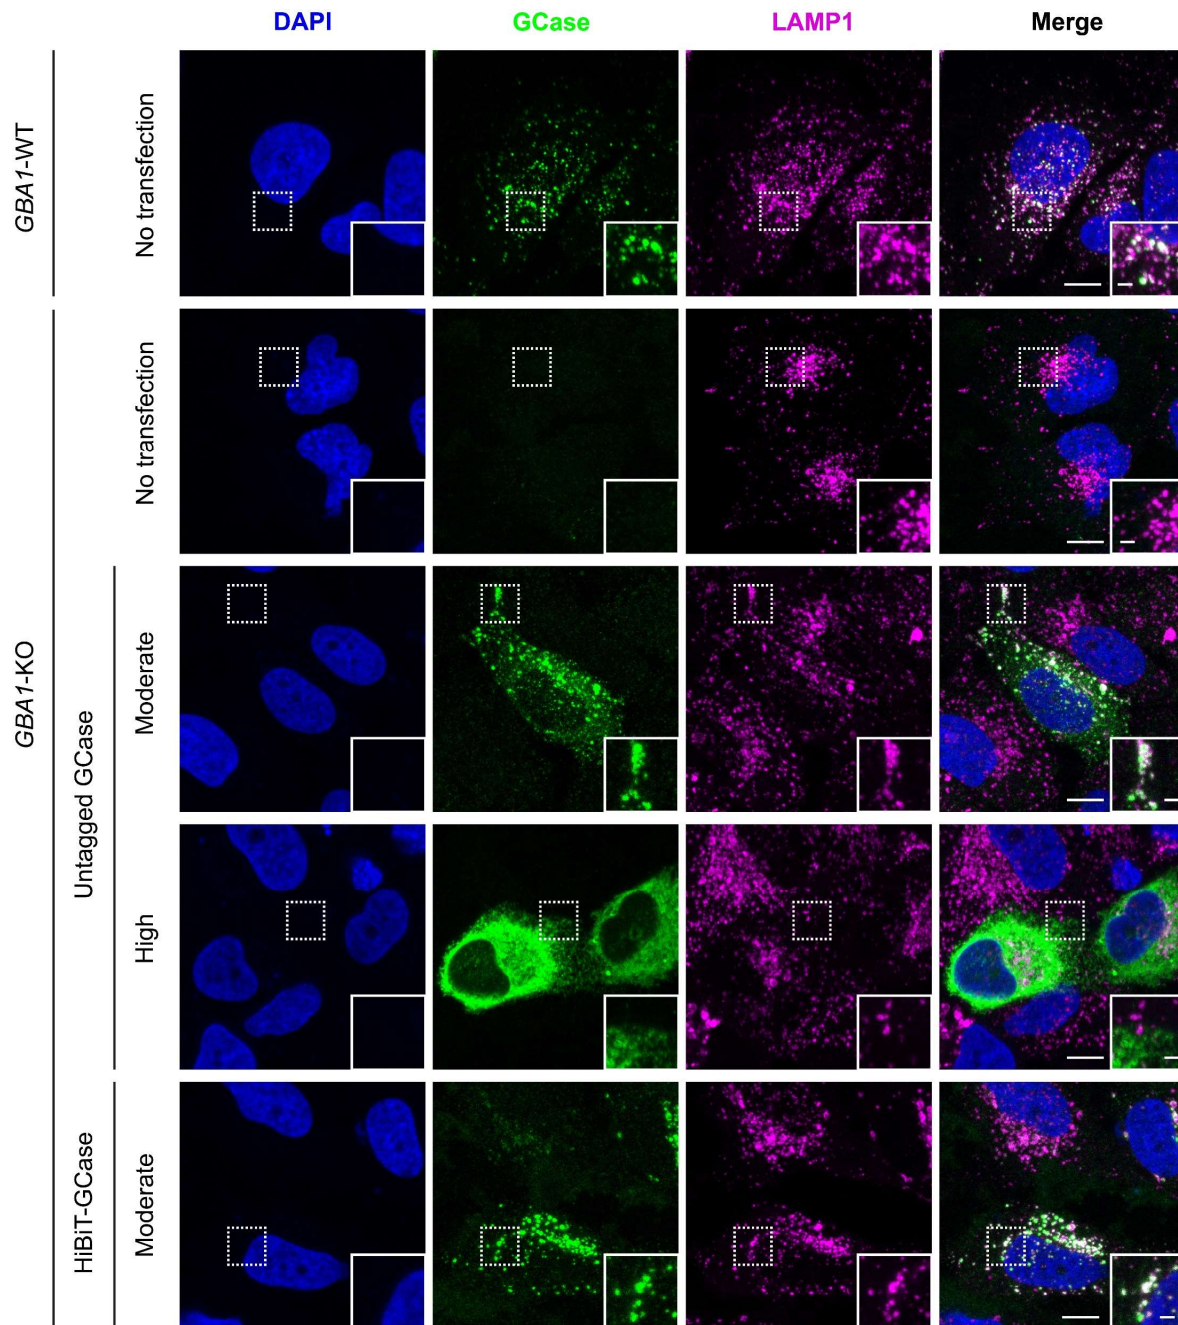

**Figure S1. Overexpression of *GBA1* drives mis-localization.** *GBA1*-WT or *GBA1*-KO H4 cells were transfected with constructs containing the HiBiT-*GBA1* transgene or untagged *GBA1*. Transfection produced a heterogeneous population of cells with either low, moderate, or high levels of GCase expression; the latter perturbed GCase trafficking to the lysosome. GCase was stained with hGCase-1/23 antibody (green), while lysosomes were stained for LAMP1 (magenta).

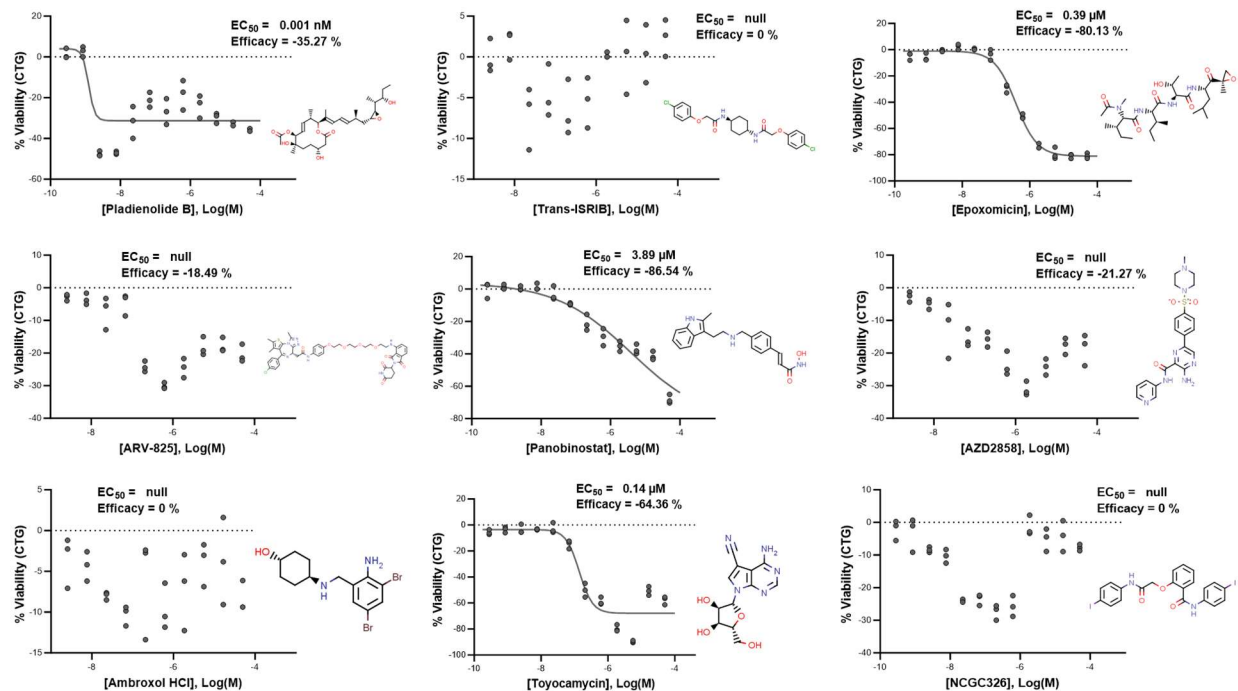

**Figure S2. Follow-up cytotoxicity testing of selected primary qHTS hits using CellTiter-Glo assay.** HiBiT-GCase-L444P H4 cells were seeded into 1536-well solid white plates (2,000 cells in 5 μL media) for 24 h and incubated with a titration of representative hits from the HiBiT primary screen for 24 h at concentrations ranging from 0.3 nM – 50 μM (12-point, 3x dilution series;  $n = 3$ ). The CellTiter-Glo assay was then performed as described in the methods. Response values (% viability) are based on change in luminescence (RLU) in compound-treated versus DMSO-treated cells.

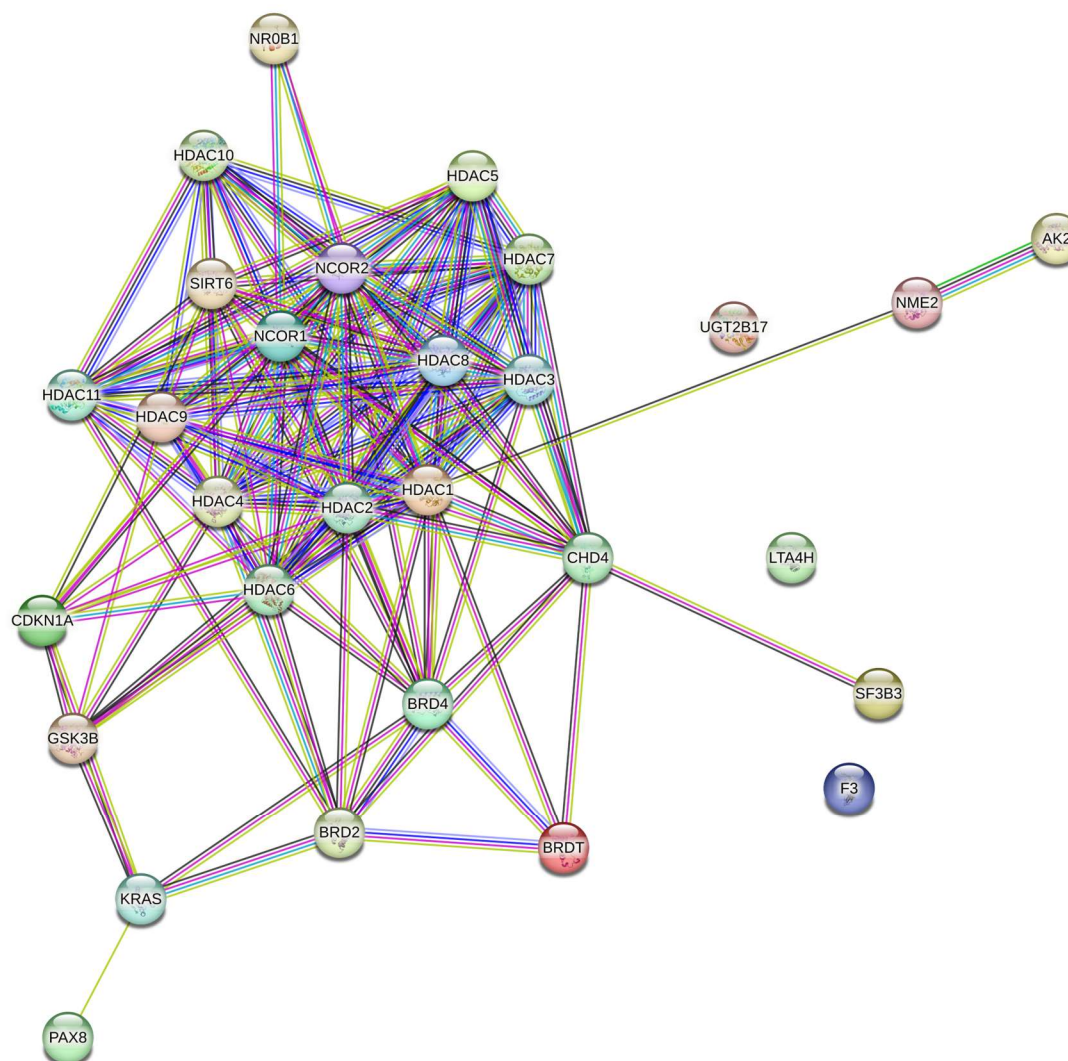

**Figure S3. Interaction network of molecular targets of primary qHTS hits.** Known and predicted protein-protein interaction network from STRING database for the 30 enriched targets identified from target profiles of final hit compounds. **Table S2** lists the pathways in the Reactome database that are overrepresented by these enriched targets, revealing potential pathways affected by the hit compounds.

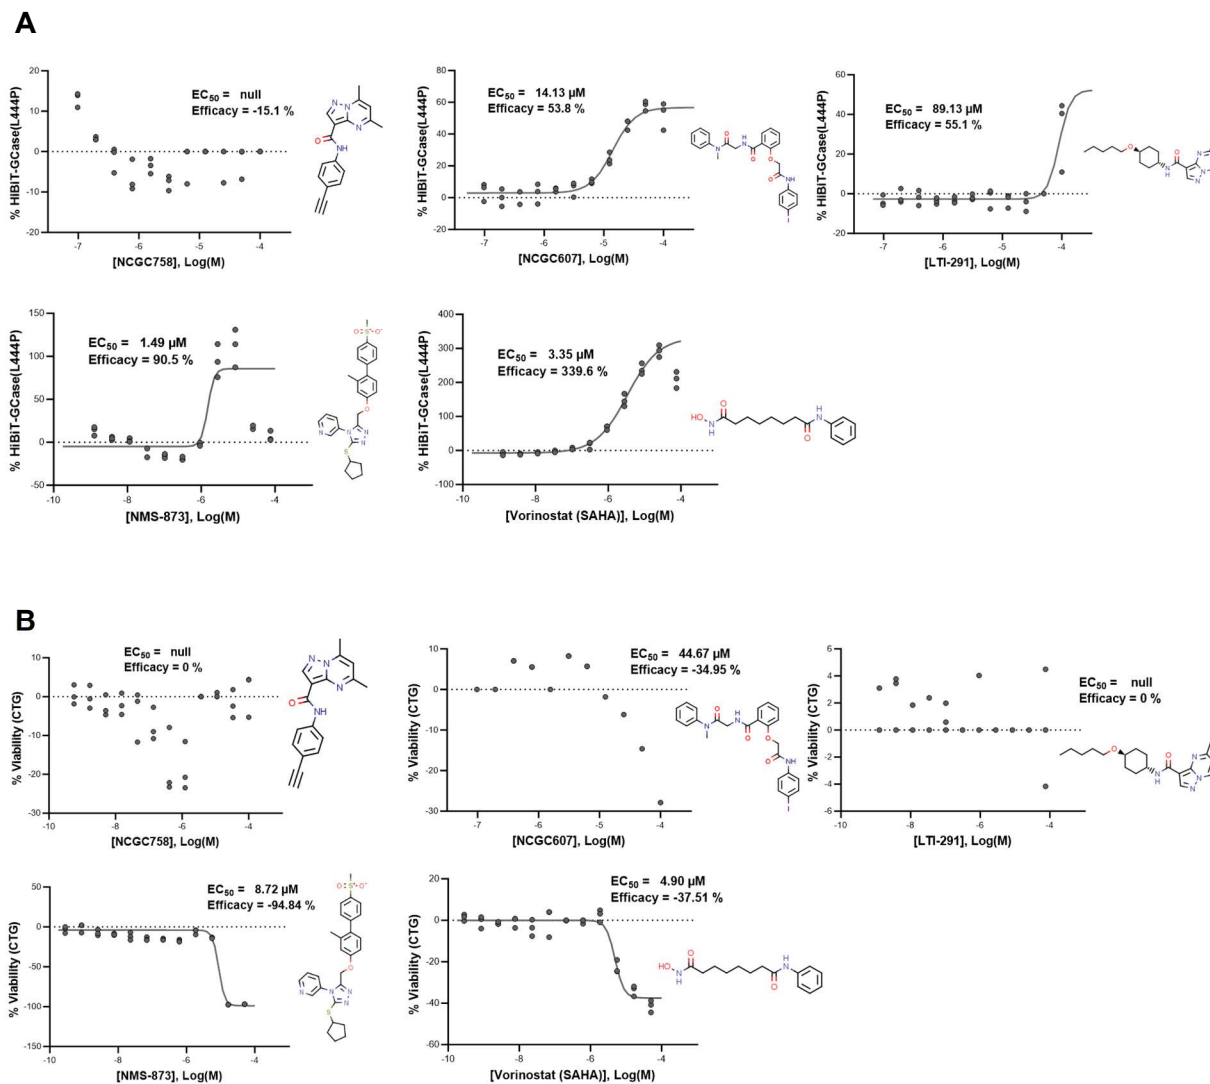

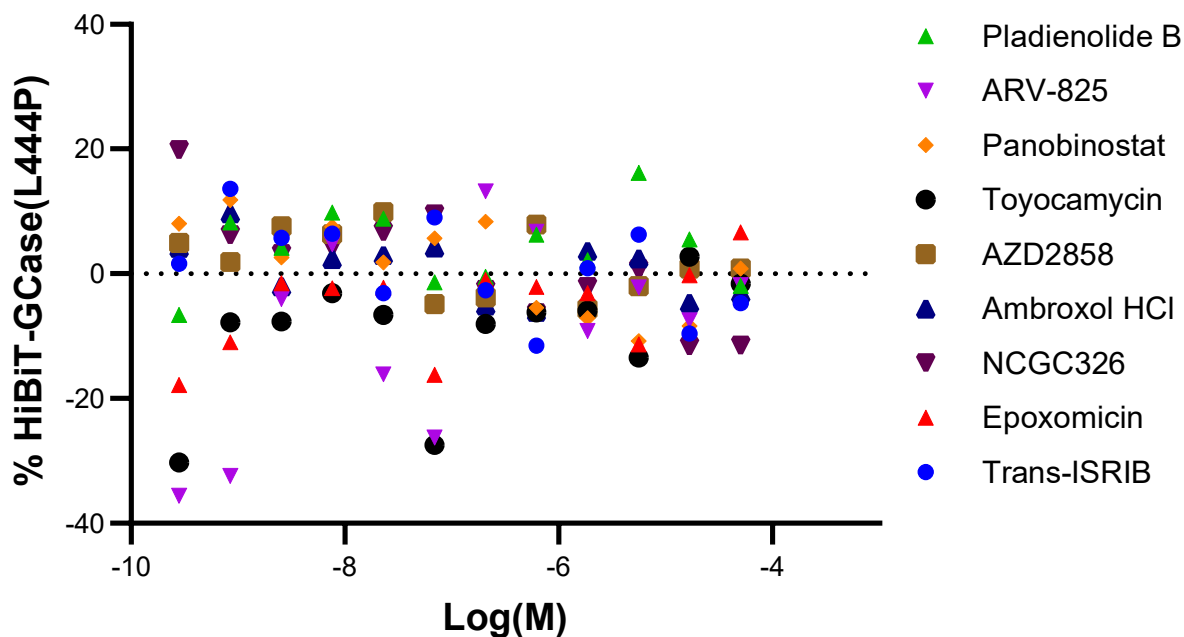

**Figure S5. HiBiT-GCase-L444P assay interference testing for selected hits.** Selected final hit compounds that increased HiBiT-GCase-L444P levels in H4 cells in the follow-up screen were tested for their ability to interfere with the reconstituted luciferase enzyme in the HiBiT-GCase assay. HiBiT-GCase-L444P H4 cells were seeded into 1536-well solid white plates (2,000 cells in 5  $\mu$ L media) for 48 h and treated with a titration of compounds for 30 min, after which the HiBiT assay was performed to determine if the compounds were directly affecting HiBiT luminescence. Data are from three independent replicates.

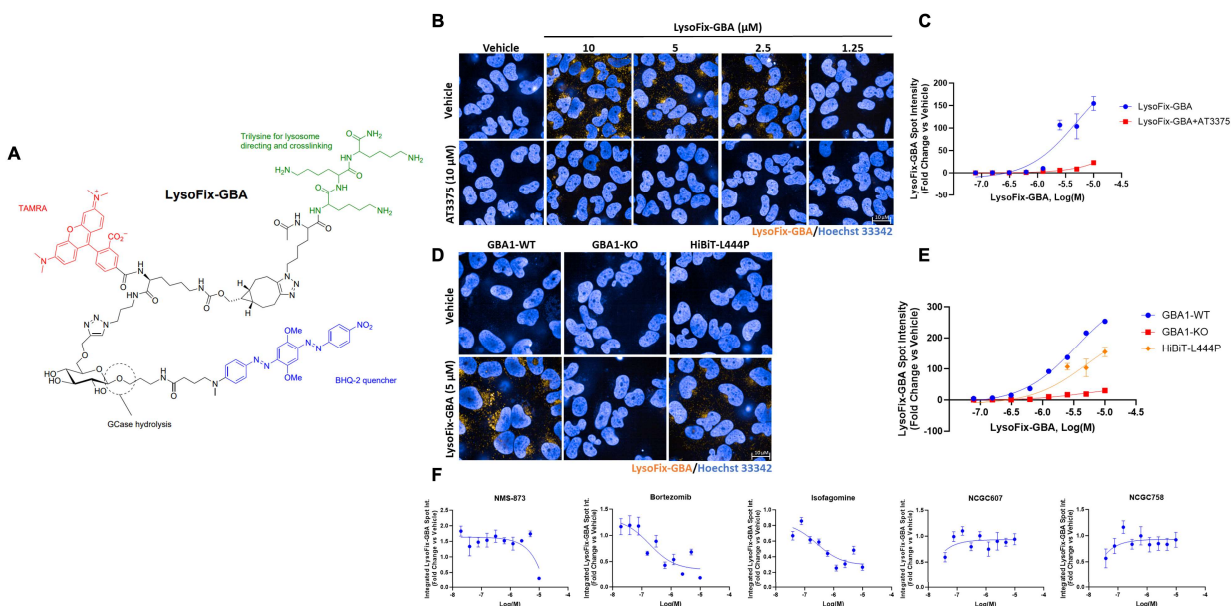

**Figure S6. Implementation of LysoFix-GBA high-content screening assay in HiBiT-GCase-L444P H4 reporter line.** (A) Chemical structure of LysoFix-GBA. (B) To optimize LysoFix-GBA concentration, HiBiT-GCase-L444P H4 cells were seeded into 384-well PerkinElmer PhenoPlates (25,000 cells in 40  $\mu$ L media) for 24 h, followed by treatment with *GBA1* inhibitor AT3375 (10  $\mu$ M) or vehicle (DMSO) for 24 h. Cells were then incubated with LysoFix-GBA (78 nM – 10  $\mu$ M; 8-point, 2x dilution series) for 2 h at 37°C and imaged after 15 min of nuclear staining with Hoechst-33342 (1  $\mu$ g/mL) in Fluorobrite media. (C) Data are represented as fold change in integrated LysoFix-GBA spot intensity per cell, relative to DMSO control. (Error bars: SEM [ $n = 4 - 6$ ]). (D, E) Following the same approach, *GBA1*-WT, *GBA1*-KO, and HiBiT-GCase-L444P H4 cells were tested against a titration of LysoFix-GBA. (Error bars: SEM [ $n = 3$ ]). (F) HiBiT-GCase-L444P H4 cells were treated with a titration of NMS-873, bortezomib, isofagomine, chaperone NCGC607, or chaperone NCGC758 for 24 h, and *GBA1* activity was assessed by LysoFix-GBA (5  $\mu$ M). (Error bars: SEM [ $n = 4 - 6$ ]).

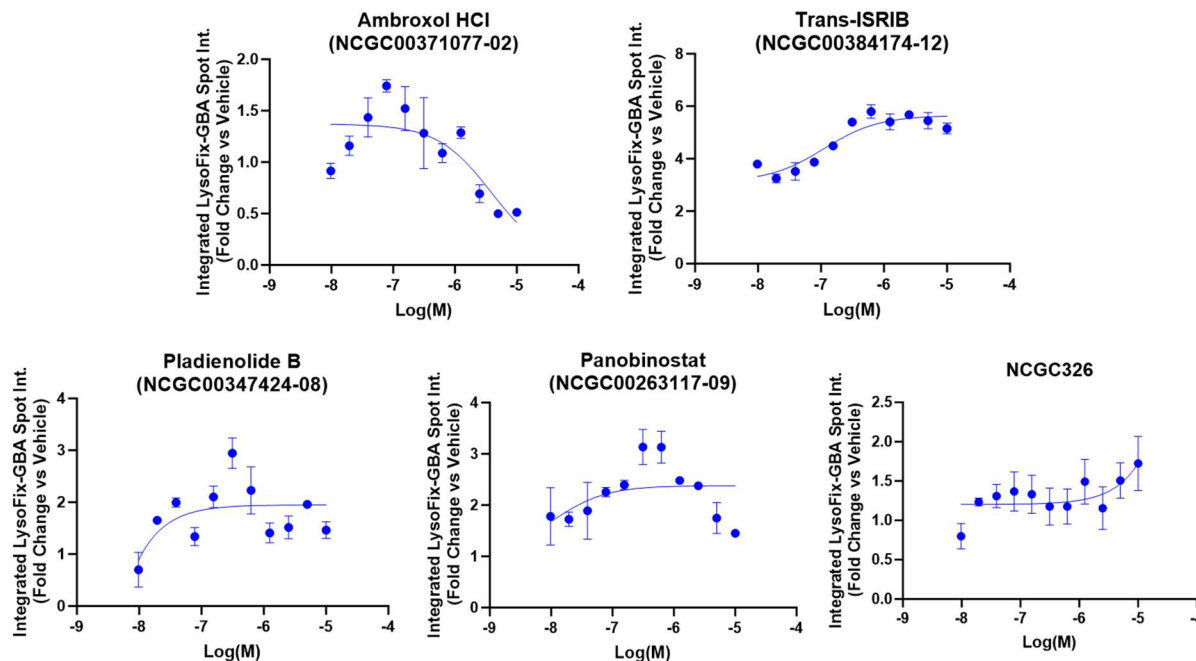

**Figure S7. Evaluation of hit compounds with LysoFix-GBA assay after 72 h of compound incubation.** HiBiT-GCase-L444P H4 cells were seeded into 384-well PerkinElmer PhenoPlates (25,000 cells in 40  $\mu$ L media) and incubated for 24 h. Thereafter, the cells were treated with a titration of compounds (9.8 nM – 10  $\mu$ M; 11-point, 2x dilution series) for 72 h and then incubated with LysoFix-GBA (5  $\mu$ M) for 2 h at 37°C and 5% CO<sub>2</sub>. High-content imaging was performed after 15 min of nuclear staining with Hoechst-33342 (1  $\mu$ g/mL) in Fluorobrite media. Data are represented as the fold change (compound-treated vs. DMSO-treated) in integrated LysoFix-GBA spot intensity per cell. Dose-response curves were fit using log(agonist) vs. response (three parameters). (Error bars: SEM [ $n = 2 - 5$ ]).

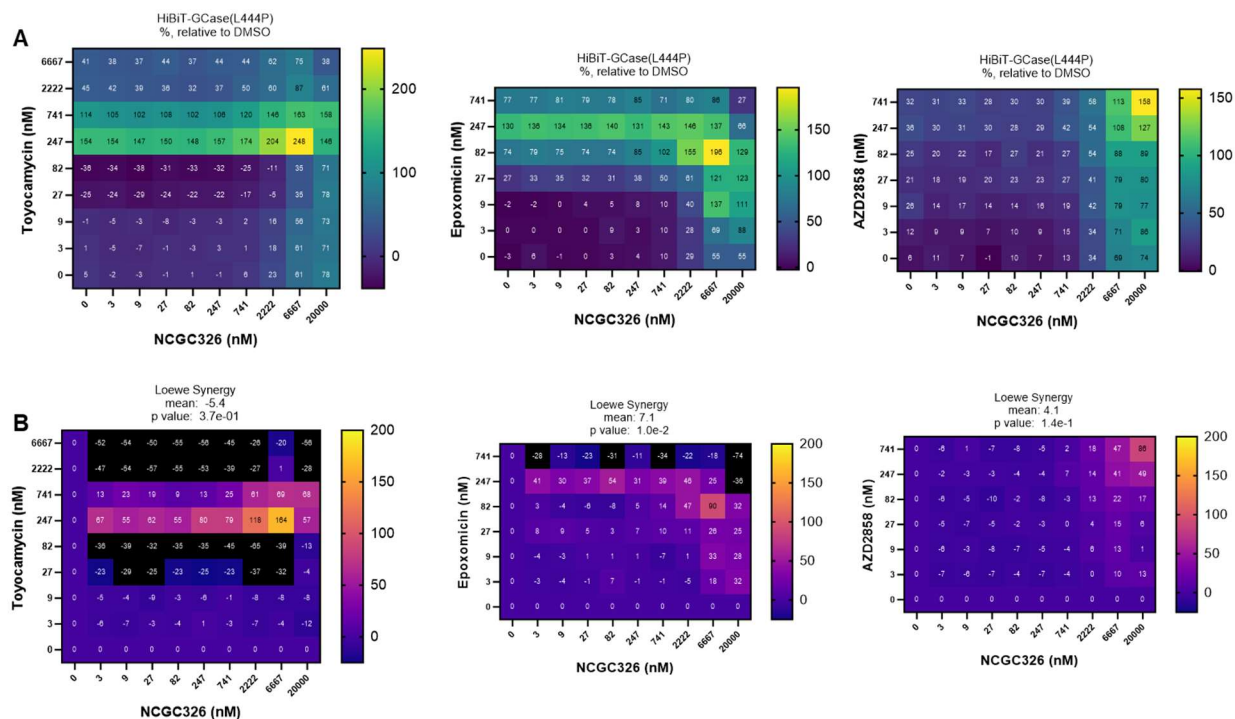

**Figure S8. Matrix combination screening with NCGC326 and additional hits from primary HiBiT screen.** HiBiT-GCcase-L444P H4 cells were tested in 10 x 10 pairwise dose-response combinatorial matrix format. Cells were treated for 24 h with chaperone NCGC326 in a 9-point titration (3 nM – 20  $\mu$ M, 3x dilution) against the same 9-point titration of toyocamycin, epoxomicin, or AZD2858; the HiBiT-GCcase lytic assay was then performed. Luminescence response values were normalized to intraplate DMSO-treated controls, such that 100% activity reflects a doubling of HiBiT-GCcase levels. Synergy was evaluated based on the dose-response matrix (**A**) and the Loewe synergy score (**B**). In general, negative, zero, and positive synergy scores indicate antagonistic, additive, and synergistic interactions, respectively, between drugs. If a dose-response curve could not be fit due to toxicity at top concentrations, these concentrations were omitted from the analysis.  $n = 3$ .
